# Supplementary material for: Геомеханика и газодинамика самонагревания угля в подземных горных выработках
Source: Hindawi journal article supplement (doi:10.1155/2022/7406694), 2001-01-01
Supplement: f1 [file 7406694.f1.pdf]

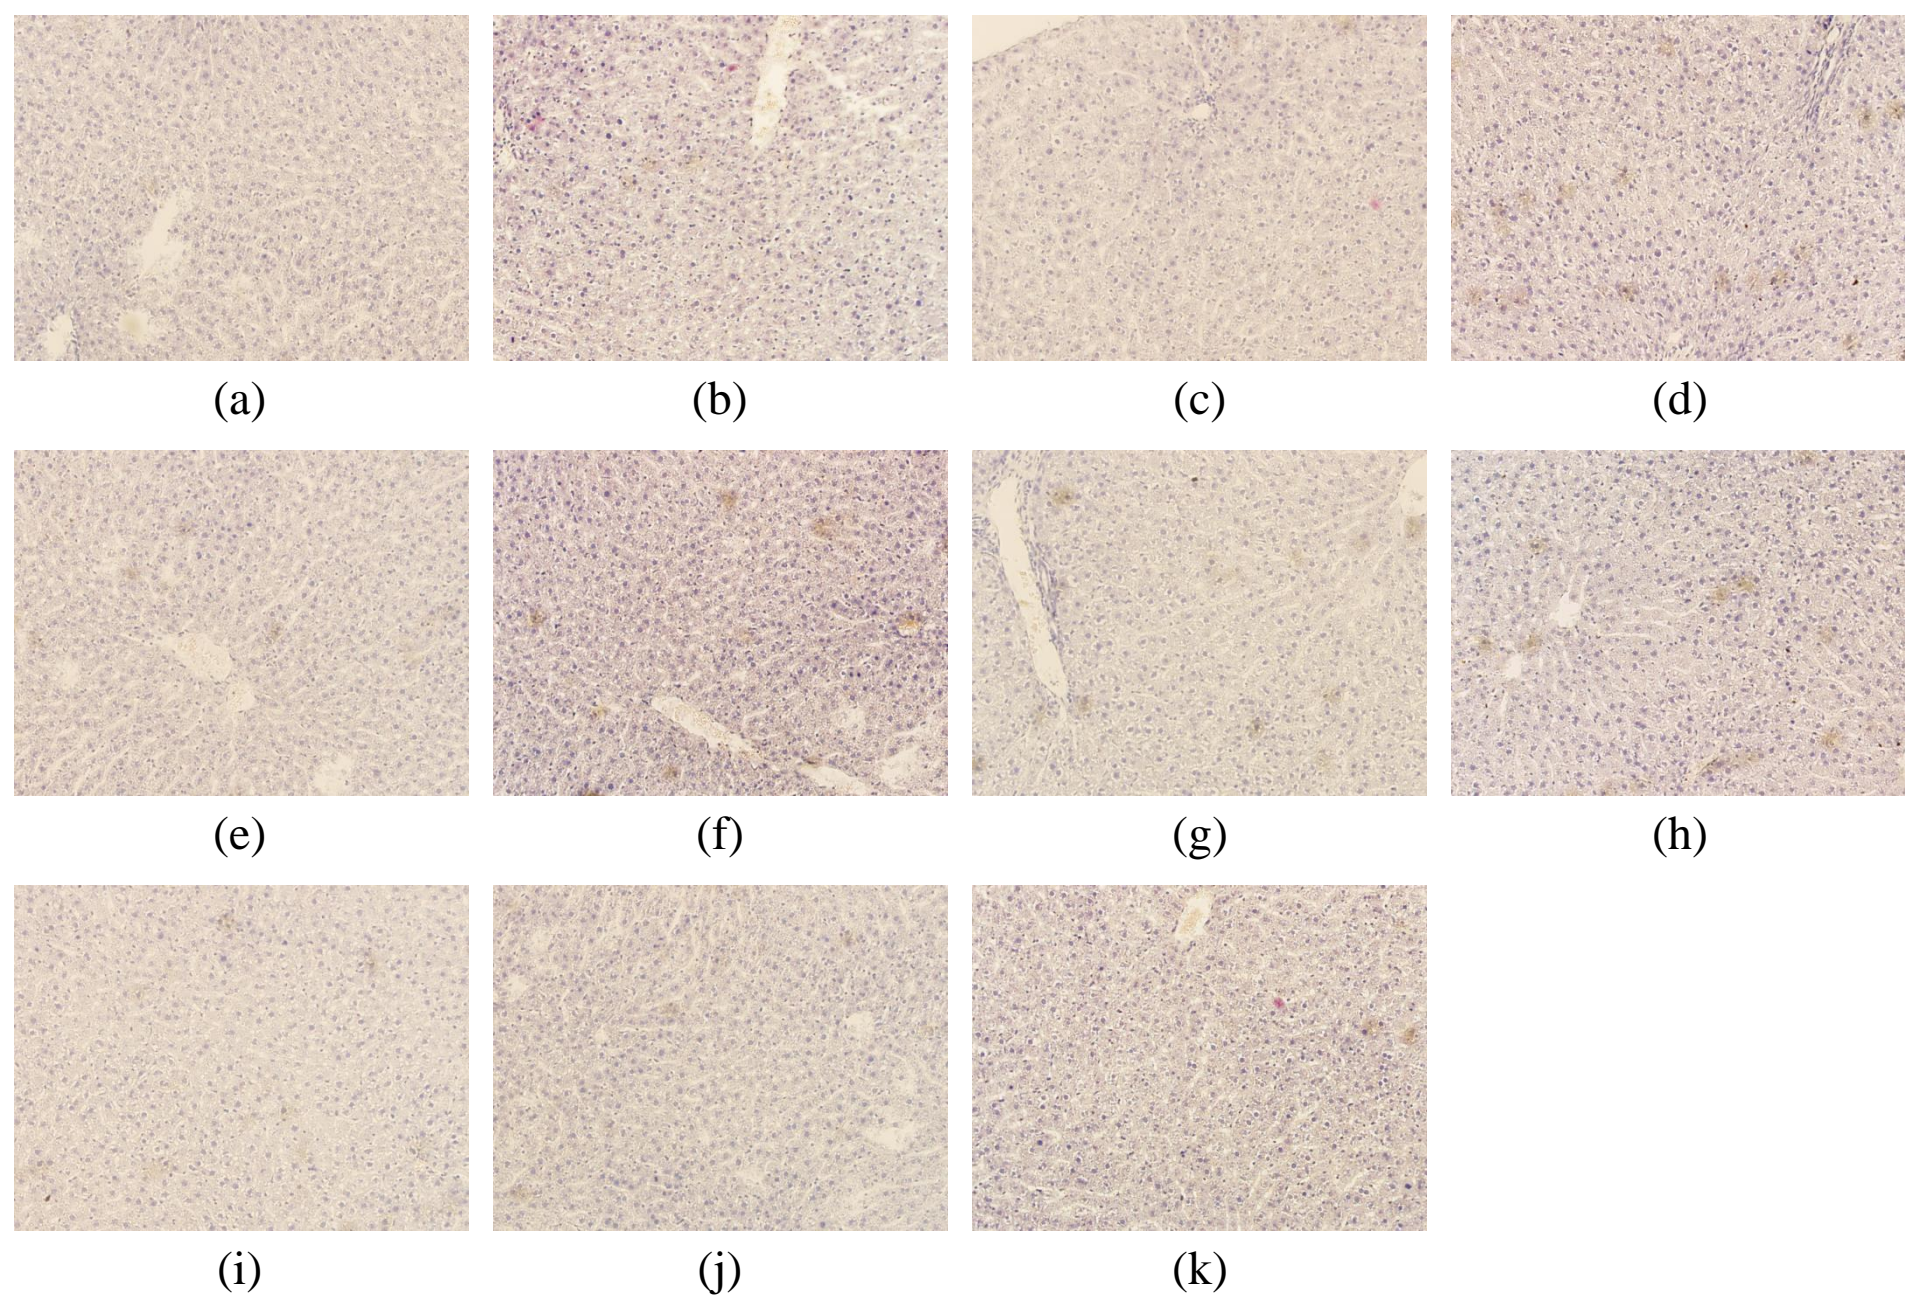

**Figure S1.** Photomicrographs of representative sections of livers from the control group (a), group R (b), group NJT (c), group RBC (d), group RBS (e), group RGF (f), group RRR (g), group RSR (h), group RPR (i), group RGR (j), group RFH (k).

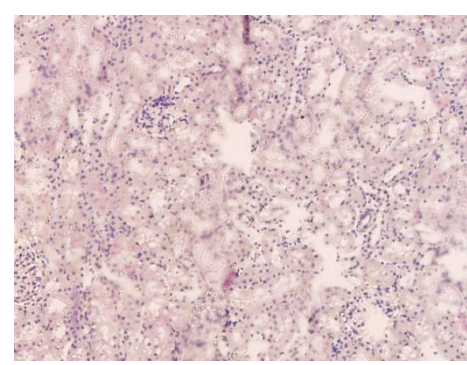

(a)

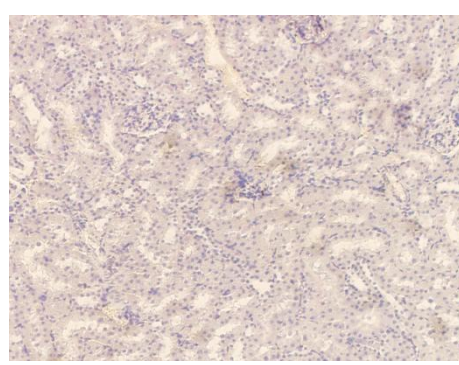

(b)

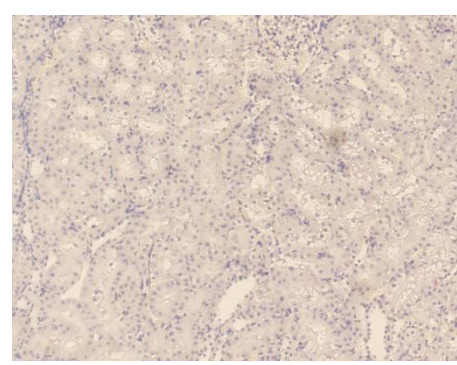

(c)

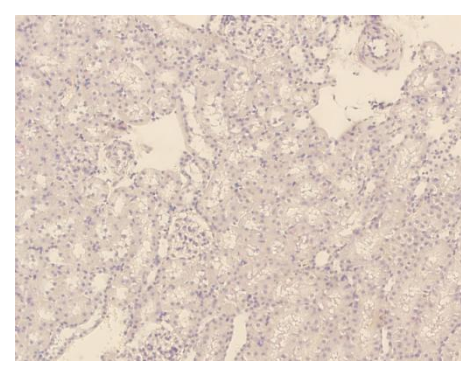

(d)

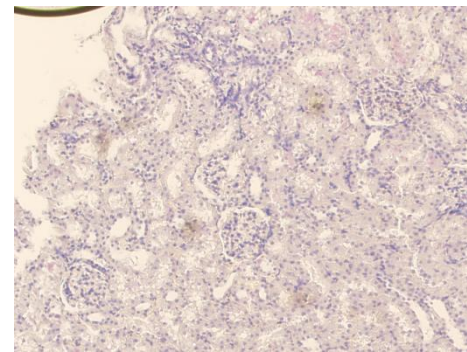

(e)

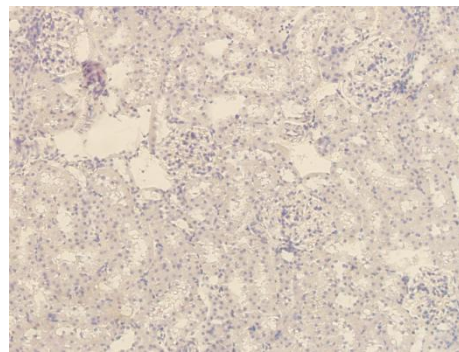

(f)

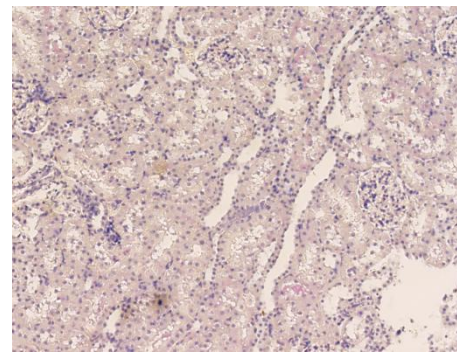

(g)

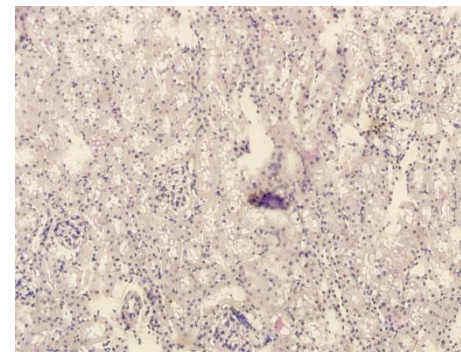

(h)

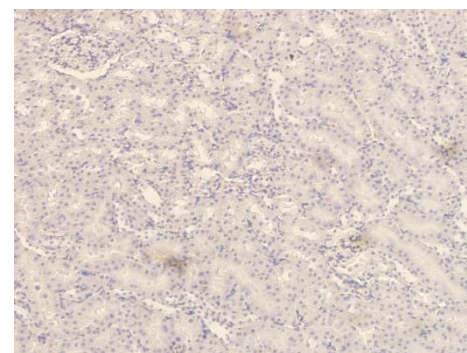

(i)

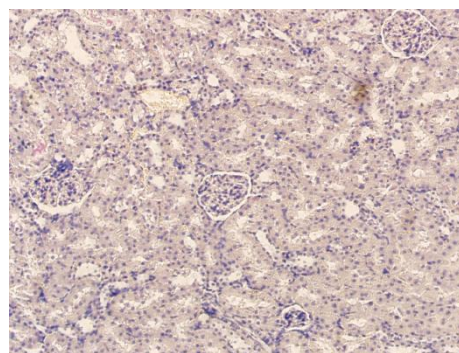

(j)

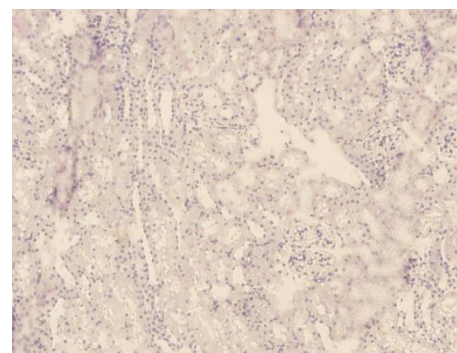

(k)

**Figure S2.** Photomicrographs of representative sections of kidneys from the control group (a), group R (b), group NJT (c), group RBC (d), group RBS (e), group RGF (f), group RRR (g), group RSR (h), group RPR (i), group RGR (j), group RFH (k).
